# Supplementary material
Source: Springer Nature journal article supplement (https://www.springermedizin.de/resource/supplementary/12884_2008_177_MOESM8_ESM.pdf/9459788)
Supplement: MOESM8 [file 9459788]

Potentially relevant citations identified from electronic searches to capture primary articles on all tests used in the prediction of

PET n= 19,548

SGA n= 20,167

Potentially relevant citations on hCG/ AFP/ oestriol/ PAPP-A/ Inhibin A/ in the prediction of

PET n= 1,289

SGA n= 1,769

References excluded after screening titles and/ or abstracts

PET n= 1,099

SGA n= 1,504

Primary articles retrieved for detailed evaluation

- from electronic searches PET n= 190

SGA n= 257

- from reference lists PET n= 9

SGA n= 8

Articles excluded

**PET**

**SGA**

n= 155

n= 179

- not prediction/ not test accuracy

n= 72

n= 87

- reviews/ letters/ comments/ editorials

n= 14

n= 13

- PET or SGA/FGR not separate outcome/

PIH only

n= 13

n= 4

- (mean) gestational age > 25 weeks/ unclear

n= 6

n= 46

- insufficient data to construct 2x2 table

n= 24

n= 14

- other

n= 26

n= 11

- twins only

n=0

n=4

Primary articles included in systematic review PET n= 44 SGA n= 86

Primary articles included in meta-analysis PET n=35 SGA n=53
